# Supplementary material for: Epigenetic drift underlies epigenetic clock signals, but displays distinct responses to lifespan interventions, development, and cellular dedifferentiation
Source: publisher site journal article supplement (doi:10.18632/aging.205503), 2024-01-26
Supplement: Supplementary file [file aging-v16i2-205503-supplementary-material-SD2.pdf]

## SUPPLEMENTARY TABLES

**Supplementary Table 1. Gene ontology results from regions with age-associated gains in disorder.**

| Source | GO term name                                                                    | GO ID      | Adjusted <i>p</i> -value |
|--------|---------------------------------------------------------------------------------|------------|--------------------------|
| GO:MF  | DNA-binding transcription factor activity, RNA polymerase II-specific           | GO:0000981 | 1.76E-28                 |
| GO:MF  | DNA-binding transcription factor activity                                       | GO:0003700 | 7.58E-28                 |
| GO:MF  | sequence-specific double-stranded DNA binding                                   | GO:1990837 | 5.72E-23                 |
| GO:MF  | double-stranded DNA binding                                                     | GO:0003690 | 4.64E-21                 |
| GO:MF  | sequence-specific DNA binding                                                   | GO:0043565 | 1.37E-20                 |
| GO:MF  | RNA polymerase II transcription regulatory region sequence-specific DNA binding | GO:0000977 | 1.79E-20                 |
| GO:MF  | transcription regulator activity                                                | GO:0140110 | 5.41E-20                 |
| GO:MF  | transcription cis-regulatory region binding                                     | GO:0000976 | 7.85E-19                 |
| GO:MF  | transcription regulatory region nucleic acid binding                            | GO:0001067 | 1.17E-18                 |
| GO:MF  | RNA polymerase II cis-regulatory region sequence-specific DNA binding           | GO:0000978 | 1.70E-17                 |
| GO:MF  | cis-regulatory region sequence-specific DNA binding                             | GO:0000987 | 2.57E-17                 |
| GO:MF  | binding                                                                         | GO:0005488 | 8.47E-17                 |
| GO:MF  | protein binding                                                                 | GO:0005515 | 1.12E-15                 |
| GO:MF  | DNA-binding transcription activator activity                                    | GO:0001216 | 1.01E-11                 |
| GO:MF  | DNA-binding transcription activator activity, RNA polymerase II-specific        | GO:0001228 | 1.31E-11                 |
| GO:MF  | gated channel activity                                                          | GO:0022836 | 1.80E-11                 |
| GO:MF  | DNA binding                                                                     | GO:0003677 | 8.54E-09                 |
| GO:MF  | ion channel activity                                                            | GO:0005216 | 8.80E-09                 |
| GO:MF  | voltage-gated cation channel activity                                           | GO:0022843 | 1.21E-08                 |
| GO:MF  | channel activity                                                                | GO:0015267 | 2.18E-08                 |
| GO:BP  | nervous system development                                                      | GO:0007399 | 9.36E-84                 |
| GO:BP  | neurogenesis                                                                    | GO:0022008 | 1.71E-68                 |
| GO:BP  | system development                                                              | GO:0048731 | 4.56E-67                 |
| GO:BP  | multicellular organism development                                              | GO:0007275 | 3.14E-65                 |
| GO:BP  | generation of neurons                                                           | GO:0048699 | 4.99E-63                 |
| GO:BP  | anatomical structure development                                                | GO:0048856 | 4.01E-61                 |
| GO:BP  | neuron differentiation                                                          | GO:0030182 | 3.05E-60                 |
| GO:BP  | multicellular organismal process                                                | GO:0032501 | 5.25E-58                 |
| GO:BP  | developmental process                                                           | GO:0032502 | 5.17E-57                 |
| GO:BP  | anatomical structure morphogenesis                                              | GO:0009653 | 1.15E-54                 |
| GO:BP  | cell-cell signaling                                                             | GO:0007267 | 1.09E-50                 |
| GO:BP  | central nervous system development                                              | GO:0007417 | 4.10E-48                 |
| GO:BP  | neuron development                                                              | GO:0048666 | 2.56E-47                 |
| GO:BP  | cell differentiation                                                            | GO:0030154 | 5.75E-45                 |
| GO:BP  | cell development                                                                | GO:0048468 | 9.25E-45                 |
| GO:BP  | cellular developmental process                                                  | GO:0048869 | 1.71E-44                 |
| GO:BP  | neuron projection development                                                   | GO:0031175 | 2.60E-41                 |
| GO:BP  | animal organ development                                                        | GO:0048513 | 3.67E-41                 |
| GO:BP  | brain development                                                               | GO:0007420 | 2.06E-40                 |
| GO:BP  | head development                                                                | GO:0060322 | 4.07E-40                 |

Top 20 terms from molecular function (MF) and biological process (BP) based on significance values are shown.

**Supplementary Table 2. Gene ontology results from regions with age-associated losses in disorder.**

| Source | GO term name                                           | GO ID      | Adjusted <i>p</i> -value |
|--------|--------------------------------------------------------|------------|--------------------------|
| GO:MF  | protein binding                                        | GO:0005515 | 0.00063605               |
| GO:MF  | binding                                                | GO:0005488 | 0.00159718               |
| GO:MF  | protein kinase activity                                | GO:0004672 | 0.00357349               |
| GO:MF  | phosphotransferase activity, alcohol group as acceptor | GO:0016773 | 0.01376325               |
| GO:MF  | transferase activity                                   | GO:0016740 | 0.04052106               |
| GO:BP  | developmental process                                  | GO:0032502 | 0.00019855               |
| GO:BP  | anatomical structure development                       | GO:0048856 | 0.00021537               |
| GO:BP  | multicellular organismal process                       | GO:0032501 | 0.00032362               |
| GO:BP  | anatomical structure morphogenesis                     | GO:0009653 | 0.00042435               |
| GO:BP  | response to stimulus                                   | GO:0050896 | 0.00074356               |
| GO:BP  | signal transduction                                    | GO:0007165 | 0.0017411                |
| GO:BP  | regulation of cellular process                         | GO:0050794 | 0.0030705                |
| GO:BP  | cellular response to stimulus                          | GO:0051716 | 0.0044849                |
| GO:BP  | signaling                                              | GO:0023052 | 0.00807516               |
| GO:BP  | cell communication                                     | GO:0007154 | 0.01493627               |
| GO:BP  | regulation of biological process                       | GO:0050789 | 0.01644778               |
| GO:BP  | biological regulation                                  | GO:0065007 | 0.02094827               |
| GO:BP  | intracellular signal transduction                      | GO:0035556 | 0.03178697               |
| GO:BP  | multicellular organism development                     | GO:0007275 | 0.04073998               |
| GO:MF  | protein binding                                        | GO:0005515 | 0.00063605               |
| GO:MF  | binding                                                | GO:0005488 | 0.00159718               |
| GO:MF  | protein kinase activity                                | GO:0004672 | 0.00357349               |
| GO:MF  | phosphotransferase activity, alcohol group as acceptor | GO:0016773 | 0.01376325               |
| GO:MF  | transferase activity                                   | GO:0016740 | 0.04052106               |
| GO:BP  | developmental process                                  | GO:0032502 | 0.00019855               |
| GO:BP  | anatomical structure development                       | GO:0048856 | 0.00021537               |
| GO:BP  | multicellular organismal process                       | GO:0032501 | 0.00032362               |
| GO:BP  | anatomical structure morphogenesis                     | GO:0009653 | 0.00042435               |
| GO:BP  | response to stimulus                                   | GO:0050896 | 0.00074356               |
| GO:BP  | signal transduction                                    | GO:0007165 | 0.0017411                |
| GO:BP  | regulation of cellular process                         | GO:0050794 | 0.0030705                |
| GO:BP  | cellular response to stimulus                          | GO:0051716 | 0.0044849                |
| GO:BP  | signaling                                              | GO:0023052 | 0.00807516               |
| GO:BP  | cell communication                                     | GO:0007154 | 0.01493627               |
| GO:BP  | regulation of biological process                       | GO:0050789 | 0.01644778               |
| GO:BP  | biological regulation                                  | GO:0065007 | 0.02094827               |
| GO:BP  | intracellular signal transduction                      | GO:0035556 | 0.03178697               |
| GO:BP  | multicellular organism development                     | GO:0007275 | 0.04073998               |

Terms from molecular function (MF) and biological process (BP) are shown.
